# Supplementary material
Source: publisher figshare collection journal article supplement (https://gsajournals.figshare.com/ndownloader/files/28211979)
Supplement: Supplementary file 1 [file 28211979]

**TABLE S2: Primers used to test amplify junctions of LTGC events**

| **Forward primer, 5’ to 3’** | **Reverse primer, 5’ to 3’** | **Comments** |
| --- | --- | --- |
| TGGAGGCAAGTTCAATAATTTC | GATGCCCGATAATTCCTCAC | LTGC 2 junction #1 |
| TGGAGGCAAGTTCAATAATTTC | TTAGATCTATTACATTATGGGTGG | LTGC 2 junction #2 |
| TCATCGCCTTCCCTTCATAC | TCATGCGCCCTTTTTAAGTC | LTGC 2 junction #3 |
| ACAAAGCTTGCCTTGCAGTT | GCTGGGTGAGCGGTAGATAG | LTGC 4 Junction #2 |
| AGCTAAATTTGCCGATGCTG | GAAAGGAAACGGTGATACGG | LTGC 4 Junction #2 |
| CCGTATCACCGTTTCCTTTC | TAAGGAAATCCCCTTGGTTG | LTGC 4 Junction #2 |
| CTCATGTGGTACAGCGTTGG | TGCGGGCTTATAGGAACATC | LTGC 6 junction #1 |
| GACACGGTCAAATCGTTTCC | AGTGCTTAAAAGGCGTTTGC | LTGC 6 junction #2 |
| GGTTTGGCCATCTCTTCTTG | CCTGCGCAAACTTTTACTCC | LTGC 6 junction #2 |
| TTAGATCTATTACATTATGGGTGG | AATGGTGGGCTTGGTTATTG | LTGC 7 junction #1 |
| GACACGGTCAAATCGTTTCC | AGTGCTTAAAAGGCGTTTGC | LTGC 7 junction #2 |
| GGTTTGGCCATCTCTTCTTG | CCTGCGCAAACTTTTACTCC | LTGC 7 junction #2 |
| TTTTCCATAGGCGAGTCCAC | CTGACGCAGTTCTTCATTGG | LTGC 8 junction #1 |
| ACAAAGCTTGCCTTGCAGTT | GCTGGGTGAGCGGTAGATAG | LTGC 8 junction #2 |
| AGCTAAATTTGCCGATGCTG | GAAAGGAAACGGTGATACGG | LTGC 8 junction #2 |
| CCGTATCACCGTTTCCTTTC | TAAGGAAATCCCCTTGGTTG | LTGC 8 junction #2 |
| TTAGATCTATTACATTATGGGTGG | AATGGTGGGCTTGGTTATTG | LTGC 9 junction #1 |
| GGTTTTCCTTCTTGCTGGAG | ACCCTGATTCCTCCACCTTC | LTGC 9 junction #2 |
| GTAATGCCGAACAAGGGAAG | CGTTGCATACGCATTTGTTC | LTGC 10 junction #1 |
| GGAAGATGCAGAGGCAAGAC | AGCGCCCATAATCAAATCAG | LTGC 10 junction #2 |
| TCACGTCGGTACTTACGAAGG | CACCGGTGTATGGCATTGG | LTGC 10 junction #3 |
| TACCCCTGTCCCTGAGAATG | TACTCCTGTTTCCCGAATGC | LTGC 10 junction #4 |
| ATTGCGGGAACATTAGATGG | ATAAGTCCGGTAGCCTGCTG | LTGC 12 junction #2 |
| GTAATGCCGAACAAGGGAAG | CGTTGCATACGCATTTGTTC | LTGC 13 junction #1 |
| TCATCGCCTTCCCTTCATAC | TCATGCGCCCTTTTTAAGTC | LTGC 13 junction #2 |
| ACAAAGCTTGCCTTGCAGTT | GCTGGGTGAGCGGTAGATAG | LTGC 13 junction #3 |
| AGCTAAATTTGCCGATGCTG | GAAAGGAAACGGTGATACGG | LTGC 13 junction #3 |
| CCGTATCACCGTTTCCTTTC | TAAGGAAATCCCCTTGGTTG | LTGC 13 junction #3 |
| ACCCCTTAGCACCACACAAC | CCCAAGTGAGAAGCCAAGAC | LTGC 14 junction #1 |
| TACCGCTGGCACAGGAATAC | TGATCGTGATCTGTTCAGGTG | LTGC 14 junction #2 |
| TGTAGCACGATATCCGCAAG | TCATGCCAAAACTACCATGC | LTGC 14 junction #3 |
| GTTAACAGGCCGAGCTCTTG | ACGAATGCCGGATAACAAAG | LTGC 15 junction #1 |
| CAATGAAGAACTGCGTCAGG | CGGGTTGGAGATGGTTATTC | LTGC 15 junction #2 |
| GTTAACAGGCCGAGCTCTTG | ACGAATGCCGGATAACAAAG | LTGC 16 junction #1 |
| TTTGAATGAATCGGAGGACATC | CAACTGGCTCCGACTCAAG | LTGC 16 junction #2 |
